1 **Estimated effectiveness of traveller screening to prevent international spread of 2019**  
2 **novel coronavirus (2019-nCoV)**

3  
4 Katelyn M. Gostic<sup>1\*</sup>, Ana C. R. Gomez<sup>2</sup>, Riley O. Mummah<sup>2</sup>, Adam J. Kucharski<sup>3</sup>, James O.  
5 Lloyd-Smith<sup>2,4\*</sup>

6  
7 <sup>1</sup>University of Chicago, United States

8 <sup>2</sup>University of California Los Angeles, United States

9 <sup>3</sup>London School of Tropical Hygiene and Medicine, United Kingdom

10 <sup>4</sup>Fogarty International Center, National Institutes of Health, United States

11 \*Correspondence to: [kgostic@uchicago.edu](mailto:kgostic@uchicago.edu) & [jlloydsmith@ucla.edu](mailto:jlloydsmith@ucla.edu)

12  
13  
14 **Abstract**

15 Traveller screening is being used to limit further global spread of 2019 novel coronavirus (nCoV)  
16 following its recent emergence. Here, we project the impact of different travel screening  
17 programs given remaining uncertainty around the values of key nCoV life history and  
18 epidemiological parameters. Even under best-case assumptions, we estimate that screening will  
19 miss more than half of infected travellers. Breaking down the factors leading to screening  
20 successes and failures, we find that most cases missed by screening are fundamentally  
21 undetectable, because they have not yet developed symptoms and are unaware they were  
22 exposed. These findings emphasize the need for measures to track travellers who become ill  
23 after being missed by a travel screening program. We make our model available for interactive  
24 use so stakeholders can explore scenarios of interest using the most up-to-date information. We  
25 hope these findings contribute to evidence-based policy to combat the spread of nCoV, and to  
26 prospective planning to mitigate future emerging pathogens.

27  
28 **Introduction**

29 As of January 28, 2020, the novel 2019 coronavirus (nCoV) outbreak has been intensifying  
30 rapidly in China, and has demonstrated potential for international spread. Many jurisdictions  
31 have imposed traveller screening and other travel restrictions (World Health Organization,  
32 2020). It is widely recognized that screening measures are imperfect barriers to spread (Bitar et  
33 al., 2009; Gostic et al., 2015; Mabey et al., 2014), due to: the absence of detectable symptoms  
34 during the incubation period; variation in the severity and detectability of symptoms once the  
35 disease begins to progress; imperfect performance of screening equipment or personnel; or  
36 active evasion of screening by travellers. Previously we estimated the effectiveness of traveller  
37 screening for a range of pathogens that have emerged in the past, and found that arrival  
38 screening would miss 50–75% of infected cases even under optimistic assumptions (Gostic et  
39 al., 2015). Yet the quantitative performance of different policies matters for planning  
40 interventions and will influence how public health authorities prioritize different measures as the  
41 international and domestic context changes. Here we use a mathematical model to analyse the  
42 expected performance of different screening measures for nCoV, based on what is currently  
43 known about its natural history and epidemiology and on different possible combinations of  
44 departure and arrival screening policies.

45 Our previous analysis considered the contributions of both departure and arrival screening  
46 programs, focusing on the context of international spread of infections via air travel. In the  
47 current context of the nCoV outbreak, both departure and arrival screening have been proposed  
48 and implemented in some countries, though neither approach is likely to be applied uniformly to  
49 all air travellers. Traveller screening is also being applied in other contexts, including at  
50 roadside spot checks on major routes out of Wuhan. These are directly analogous to departure  
51 screens in our earlier analysis, i.e. one-off screening efforts with no delay due to travel duration.

52  
53 As of January 28, 2020, the Chinese government has been expanding the geographic area and  
54 modes of transportation subject to strong travel restrictions. If there was perfect compliance and  
55 the restricted area encompassed all areas with community transmission of the virus, then these  
56 measures could in theory eliminate the necessity of wider traveller screening. However,  
57 multiple factors point to on-going risk, including the existence of substantial numbers of cases in  
58 several population centers outside Wuhan (World Health Organization, n.d.), and very early in  
59 the outbreak, reports of citizens seeking to elude the restrictions or leaving before restrictions  
60 were in place. As the virus continues to spread within China, and as cases continue to appear in  
61 other countries, the risk of exportation of cases from beyond the current travel-restricted area is  
62 likely to grow.

63  
64 As a result, increasing emphasis has been placed on the effectiveness of arrival screening to  
65 prevent importation of cases to areas without established spread. At the same time, there is  
66 great concern about potential public health consequences if nCoV spreads to developing  
67 countries that lack health infrastructure and resources to combat it effectively. Limited  
68 resources also could mean that some countries cannot implement large-scale arrival screening.  
69 In this scenario, departure screening would be the sole barrier -- however leaky -- to importation  
70 of cases into these countries. It is also important to recognize that, owing to the lag time in  
71 appearance of symptoms in imported cases, any weaknesses in screening would continue to  
72 have an effect on case importations for up to two weeks (roughly, the maximum reported  
73 incubation period) after changes in screening policy or epidemic context in the source region.  
74 Accordingly, we consider scenarios with departure screening only, arrival screening only, or  
75 both departure and arrival screening. The model can also consider the consequences when  
76 only a fraction of the traveller population is screened, due either to travel from a location not  
77 subject to screening, or due to deliberate evasion of screening.

78  
79 The central aim of our analysis is to assess the expected effectiveness of screening for nCoV,  
80 taking account of current knowledge and uncertainties about the natural history and  
81 epidemiology of the virus. We therefore show results using the best estimates currently  
82 available, in the hope of informing policy decisions in this fast-changing environment. We also  
83 make our model available for public use as a user-friendly online app, so that stakeholders can  
84 explore scenarios of particular interest, and results can be updated rapidly as our knowledge of  
85 this new viral threat continues to expand.

86

## 87 **Results**

88

### 89 *Model*

90

91 The core model has been described previously (Gostic et al., 2015), but to summarize briefly, it  
92 assumes infected travellers can be detained due to the presence of detectable symptoms (fever  
93 or cough), or due to self-reporting of exposure risk via questionnaires or interviews. Before  
94 screening, travellers can be classified into one of four categories: (1) symptomatic and aware  
95 that exposure may have occurred, (2) symptomatic but not aware of exposure risk, (3) aware of  
96 exposure risk but without detectable symptoms, and (4) neither symptomatic nor aware of  
97 exposure risk (Fig. 1). Travellers in the final category are fundamentally undetectable, and  
98 travellers in the third category are only detectable if aware that they have been exposed and  
99 willing to self report.

100

101 In the model, screening for symptoms occurs prior to questionnaire-based screening for  
102 exposure risk, and detected cases do not progress to the next stage. This approach allows us to  
103 track the fraction of cases detected using symptom screening or risk screening at arrival or  
104 departure. Additionally, the model keeps track of four ways in which screening can miss infected  
105 travellers: (1) due to imperfect sensitivity, symptom screening may fail to detect symptoms in  
106 travellers that display symptoms; (2) questionnaires may fail to detect exposure risk in travellers  
107 aware they have been exposed, owing to deliberate obfuscation or misunderstanding; (3)  
108 screening may fail to detect both symptoms and known exposure risk in travellers who have  
109 both and (4) travellers not exhibiting symptoms and with no knowledge of their exposure are  
110 fundamentally undetectable. Here, we only consider infected travellers who submit to screening.  
111 However, the supplementary app allows users to consider scenarios in which some fraction of  
112 infected travellers intentionally evade screening (Fig. 1E).

113

### 114 *Parameters*

115

116 The probability that an infected traveller is detectable in a fever screen depends on: the  
117 incubation period (the time from exposure to onset of detectable symptoms); the proportion of  
118 subclinical cases (mild cases that never develop detectable symptoms); the sensitivity of  
119 thermal scanners used to detect fever; the fraction of cases aware they have high exposure risk;  
120 and the fraction of those cases who would self-report truthfully on a screening questionnaire.  
121 Further, the distribution of individual times since exposure affects the probability that any single  
122 infected traveller has progressed to the symptomatic stage. In a growing epidemic, the majority  
123 of infected cases will have been recently exposed, and will not yet show symptoms. We used  
124 methods described previously to estimate the distribution of individual times since exposure for  
125 different parameter regimes (Gostic et al., 2015). Briefly, the model assumes the fraction of  
126 cases who are recently exposed increases with  $R_0$ . The distribution of times since exposure is  
127 truncated at a maximum value, which corresponds epidemiologically to the maximum time from  
128 exposure to patient isolation, after which point we assume cases will not attempt to travel.  
129 (Isolation may occur due to hospitalization, or due to confinement at home in response to  
130 escalating symptoms or nCoV diagnosis).

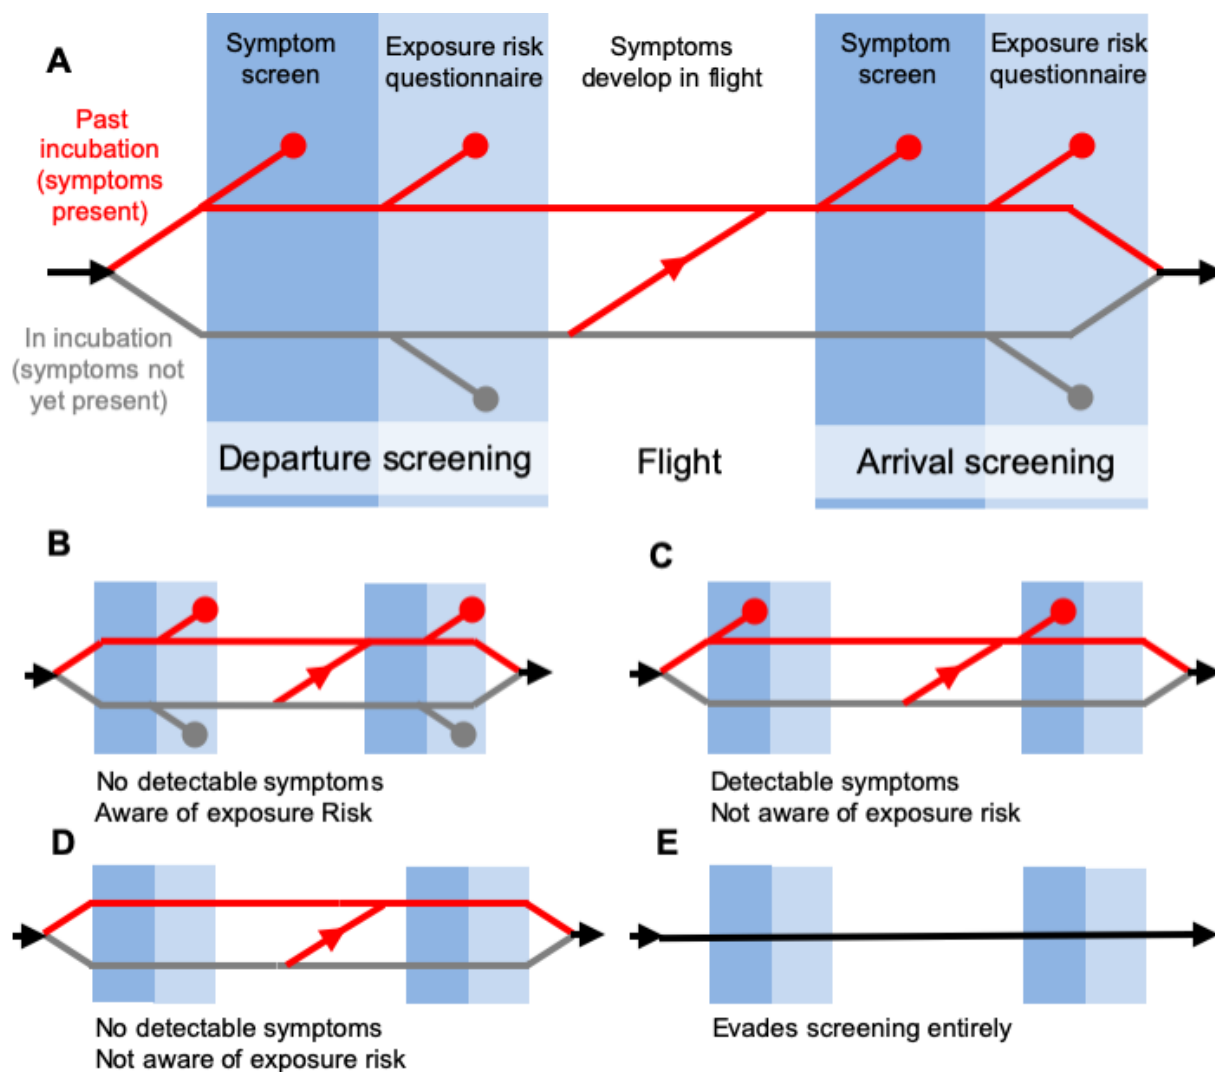

131  
132

133 **Fig 1. Model of traveller screening process**, adapted from Gostic et al., eLife, 2015. Infected  
134 travellers fall into one of five categories: (A) Symptomatic cases aware of exposure risk are  
135 detectable in both symptom screening and questionnaire-based risk screening. (B) Subclinical  
136 and not-yet-symptomatic cases aware of exposure risk are only detectable using risk screening.  
137 (C) Symptomatic cases unaware of exposure risk are only detectable in symptom screening.  
138 (D-E) Subclinical cases who are unaware of exposure risk, and individuals that evade  
139 screening, are fundamentally undetectable.

140

| Parameter                                                                                          | Best estimate (Analyses in Fig. 2)                                              | Plausible range (Analyses in Fig. 3) | References and rationale                                                                                                                                                                                                                                                         |
|----------------------------------------------------------------------------------------------------|---------------------------------------------------------------------------------|--------------------------------------|----------------------------------------------------------------------------------------------------------------------------------------------------------------------------------------------------------------------------------------------------------------------------------|
| Mean incubation period                                                                             | 5.5 days<br>Sensitivity: 4.5 days or 6.5 days                                   | 4.5-6.5 days                         | 3-6 days (Chan et al., 2020)<br>4.8 days (Liu et al., 2020)<br>5.7 days (Backer et al., 2020)<br>5.2 days (Li et al., 2020)                                                                                                                                                      |
| Incubation period distribution                                                                     | Gamma distribution with shape = $\frac{mean}{1.2}$ , scale = 1.2.               |                                      |                                                                                                                                                                                                                                                                                  |
| Percent of cases subclinical (Never detectable in symptom screen)                                  | Best case scenario: 5%<br>Middle case scenario: 25%<br>Worst case scenario: 50% |                                      | n = 6: 83% fever, 67% cough (Chan et al., 2020)<br>N = 41 98% fever, 76% cough. (Huang et al., 2020)<br>N = 99: 83% fever, 82% cough. (Chen et al., 2020)<br>Subclinical cases have been reported elsewhere, and may be underrepresented in the above data                       |
| R <sub>0</sub>                                                                                     | No effect in individual-level analysis.                                         | 1.5-3.5                              | 2.2 (1.4-3.8)* (Riou and Althaus, 2020)<br>2.6 (1.5-3.5) (Imai et al., 2019)<br>3.8 (3.6-4.0) (Read et al., 2020)<br>2.9 (2.3-3.6) (Liu et al., 2020)<br>2.2 (1.4-3.9) (Li et al., 2020)<br>2.7 (2.5-2.9) (Wu et al., 2020)<br>1.6-2.9 (Kucharski et al., n.d.)                  |
| Percent of travellers aware of exposure risk                                                       | 20%                                                                             | 5-40%                                | We assume a low percentage, as no specific risk factors have been identified, and known times or sources of exposure are rarely reported in existing line lists.                                                                                                                 |
| Sensitivity of infrared thermal scanners for fever                                                 | 70%                                                                             | 60%-90%                              | Most studies estimated sensitivity between 60-88% (Bitar et al., 2009; Priest et al., 2011; Tay et al., 2015). But a handful of studies estimated very low sensitivity (4-30%). In general, sensitivity depended on the device used, body area targeted and ambient temperature. |
| Probability that travellers self-report exposure risk                                              | 25%                                                                             | 5%-25%                               | 25% is an upper-bound estimate based on outcomes of past screening initiatives. (Gostic et al., 2015)                                                                                                                                                                            |
| Time from symptom onset to patient isolation<br><br>(After which we assume travel is not possible) | No effect in individual-level analysis.                                         | 3-7 days                             | Median 7 days from onset to hospitalization (n = 6) (Chan et al., 2020)<br>Mean 2.9 days onset to patient isolation (n = 164) (Liu et al., 2020)<br>Median 7 days from onset to hospitalization (n = 41) (Huang et al., 2020)                                                    |

141

142

143

144

**Table 1. Parameter values estimated in currently available studies, along with accompanying uncertainties and assumptions.** \*Confidence interval, credible interval or range reported by each study referenced.

145 At the time of this writing, nCoV-specific estimates are available for most of these parameters,  
146 but almost all have been derived from limited or preliminary data sources and remain subject to  
147 considerable uncertainty. Table 1 and the Methods summarize the current state of knowledge.  
148 Here, we used two distinct approaches to incorporate this uncertainty into our analysis.

149  
150 First, to estimate the probability that an infected individual would be detected or missed (Fig. 2),  
151 we considered a range of plausible values for the mean incubation time, and the fraction of  
152 subclinical cases. We focus on these two parameters because screening outcomes are  
153 particularly sensitive to their values. All other parameters used to generate Fig. 2 were fixed to  
154 the best available estimates listed in Table 1.

155  
156 Second, we considered a population of infected travellers, each with a unique time of exposure,  
157 and in turn a unique probability of having progressed to the symptomatic stage. Here, the model  
158 used a resampling-based approach to simultaneously consider uncertainty from both (1)  
159 stochasticity in any single individual's screening outcome, and (2) uncertainty as to the true,  
160 underlying natural history parameters driving the epidemic. Details are provided in the methods,  
161 but briefly, we constructed 1000 plausible parameter sets, drawn using Latin hypercube  
162 sampling from plausible ranges for each parameter (Table 1). Using each parameter set, we  
163 simulated screening outcomes for a population of 100 infected individuals. Fig. 3A shows the  
164 distribution of infected travellers detected per simulation, and Fig. 3B shows the mean fraction  
165 of individuals with each screening outcome from across all simulations.

166  
167  
168 *Individual probabilities of a given screening outcome*

169  
170 Our model outputs the probability of different screening outcomes through time, including the  
171 overall likelihood of detecting the infected traveller and the different contributions to success or  
172 failure. First, we explored the probability that any particular infected individual would be detected  
173 by a screening program, as a function of the time between exposure and the initiation of travel  
174 (Fig. 2). A crucial driver of the effectiveness of traveller screening programs is the duration of  
175 the incubation period, particularly since infected people are most likely to travel before the onset  
176 of symptoms. Here we considered three scenarios with different mean incubation periods: 5.5  
177 days is most consistent with most existing estimates, while 4.5 and 6.5 days provide a  
178 sensitivity analysis roughly consistent with ranges, confidence or credible intervals reported  
179 elsewhere (Backer et al., 2020; Chan et al., 2020; Li et al., 2020; Liu et al., 2020). Even within  
180 the narrow range tested, screening outcomes were sensitive to the incubation period mean. For  
181 longer incubation periods, we found that larger proportions of departing travellers would not yet  
182 be exhibiting symptoms – either at departure or arrival – which in turn reduced the probability  
183 that screening would detect these cases, especially since we assume few infected travellers will  
184 realize they have been exposed to nCov.



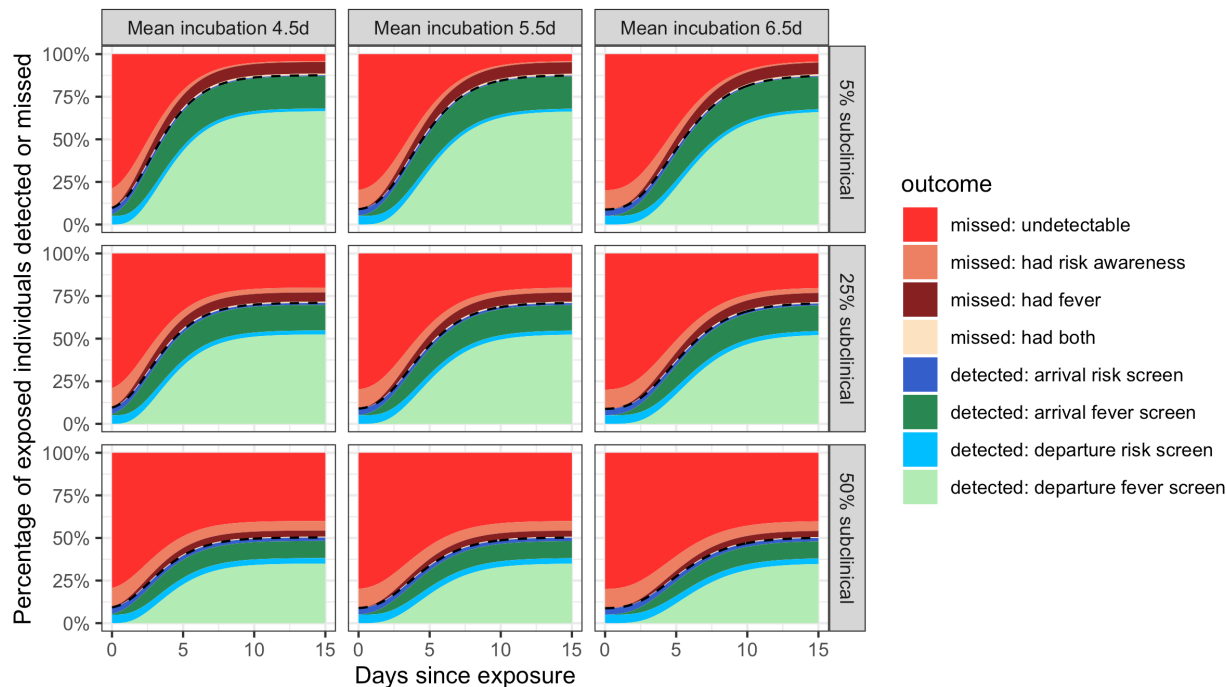

185  
186 **Fig 2. Individual outcome probabilities for travellers who screened at given time since**  
187 **infection.** Columns show three possible mean incubation periods, and rows show three  
188 plausible probabilities that an infected person is subclinical. Here, we assume screening occurs  
189 at both arrival and departure; see Fig. 2 - supplementary figure 1 and Fig. 2 - supplementary  
190 figure 2 for departure or arrival screening only. The black dashed lines separate detected cases  
191 (below) from missed cases (above). Here, we assume flight duration = 24 hours, the probability  
192 that an individual is aware of exposure risk is 0.2, the sensitivity of fever scanners is 0.7, and  
193 the probability that an individual will truthfully self-report on risk questionnaires is 0.25. Table 1  
194 lists all other input values.

195 A second crucial uncertainty is the proportion of cases that will develop detectable symptoms.  
196 We considered scenarios in which 5%, 25% and 50% of cases are subclinical, representing a  
197 best, middle and worst-case scenario, respectively. The middle and worst-case scenarios have  
198 predictable and discouraging consequences for the effectiveness of traveller screening, since  
199 they render large fractions of the population undetectable by fever screening (Fig. 2).  
200 Furthermore, mild cases who are unaware of their exposure risk are never detectable, by any  
201 means. This is manifested as the bright red 'undetectable' region which persists well beyond the  
202 mean incubation period. For a screening program combining departure and arrival screening, as  
203 shown in Fig. 2, the greatest contributor to case detection is the departure fever screen. The  
204 arrival fever screen is the next greatest contributor, with its value arising from two factors: the  
205 potential to detect cases whose symptom onset occurred during travel, and the potential to  
206 catch cases missed due to imperfect instrument sensitivity in non-contact infrared thermal  
207 scanners used in traveller screening (Table 1). Considering the effectiveness of departure or  
208 arrival screening only (Fig 2 - Supplementary figure 1-2), we see that fever screening is the  
209 dominant contributor in each case, but that the risk of missing infected travellers due to  
210 undetected fever is substantially higher when there is no redundancy from two successive  
211 screenings.

212  
213

#### 214 *Overall screening effectiveness in a population of infected travellers during a growing epidemic*

215

216 Next we computed population-level estimates of the effectiveness of different screening  
217 programs, as well as the uncertainties arising from the current partial state of knowledge about  
218 this recently-emerged virus. To do so, we modeled plausible population-level outcomes by  
219 tracking the fraction of infected travellers detained, given a growing epidemic and current  
220 uncertainty around parameter values. We separately consider the best, middle and worst-case  
221 scenarios for the proportion of infections that are subclinical, and for each scenario we compare  
222 the impact of departure screening only, arrival screening only, or programs that include both.

223

224 The striking finding is that even under the best-case assumptions, with just one infection in  
225 twenty being subclinical and all travellers passing through departure and arrival screening, the  
226 median fraction of infected travellers detected is only 0.34, with 95% interval extending from  
227 0.20 up to 0.50 (Fig. 3A). The total fraction detected is lower for programs with only one layer of  
228 screening, with arrival screening preferable to departure screening owing to the possibility of  
229 symptom onset during travel. Considering higher proportions of subclinical cases, the overall  
230 effectiveness of screening programs is further degraded, with a median of just one in ten  
231 infected travellers detected by departure screening in the worst-case scenario. The key driver of  
232 these poor outcomes is that, even in the best-case scenario, nearly two thirds of infected  
233 travellers will not be detectable (as shown by the red regions in Fig. 3B). This is because in a  
234 growing epidemic, the majority of travellers will have been recently infected and hence will not  
235 yet have progressed to the symptomatic stage, and because we assume that few are aware of  
236 their exposure risk. As above, the dominant contributor to successful detections is fever  
237 screening.



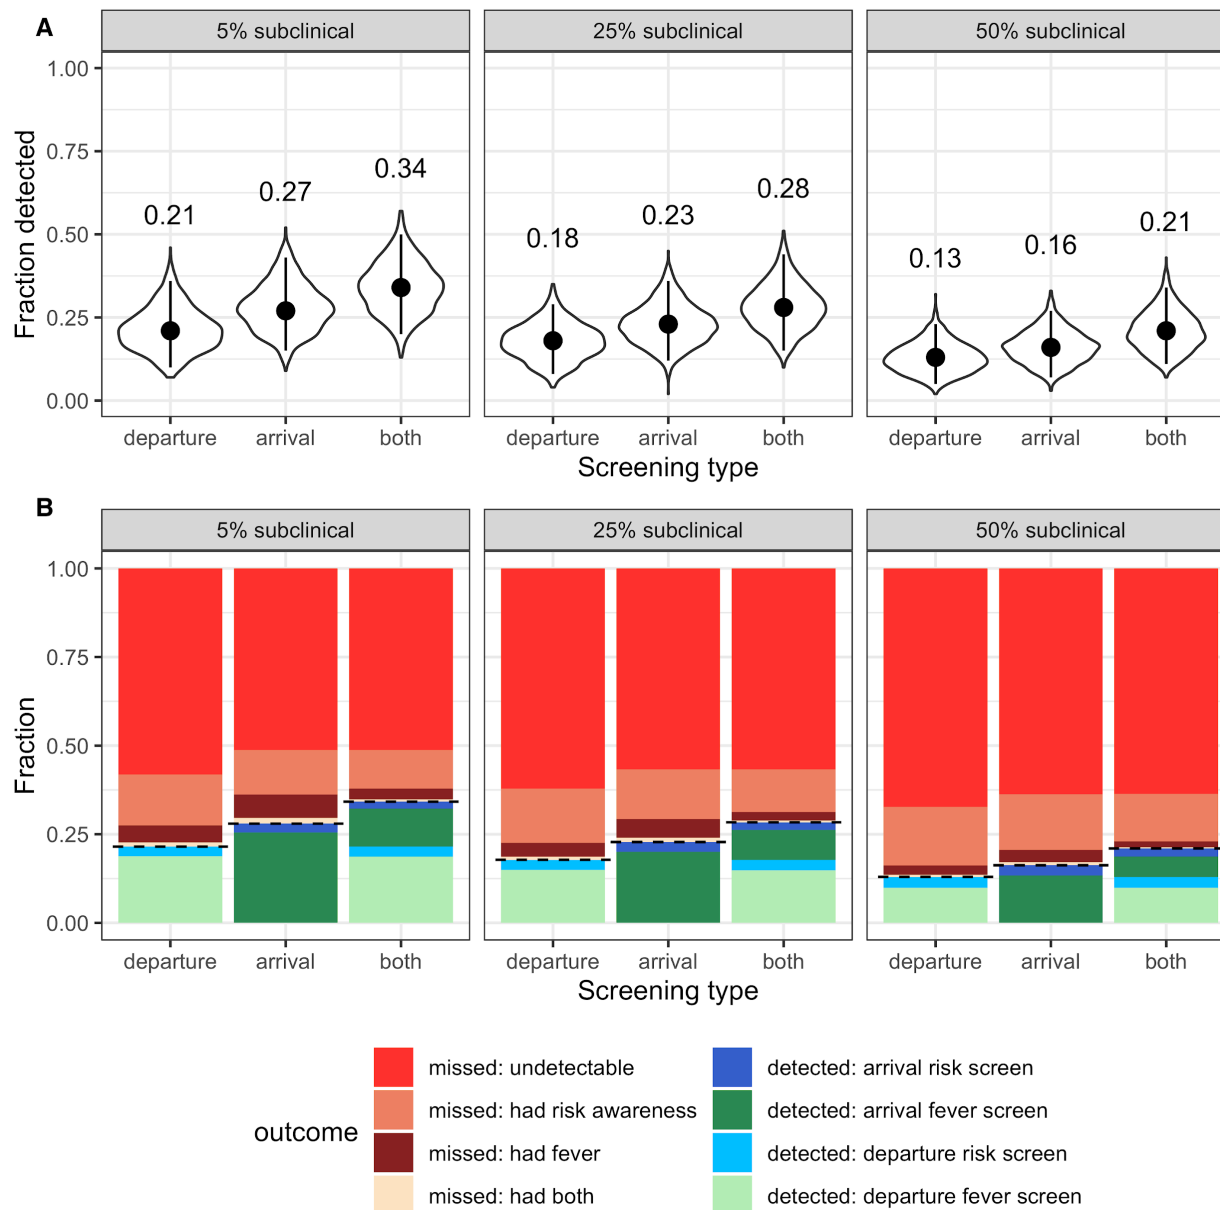

238  
 239 **Fig 3. Population-level outcomes of screening programs in a growing epidemic.** (A) Violin  
 240 plots of the fraction of infected travellers detected, accounting for current uncertainties by  
 241 running 1000 simulations using parameter sets randomly drawn from the ranges shown in Table  
 242 1. Dots and vertical line segments show the median and central 95%, respectively. Text above  
 243 each violin shows the median fraction detected. (B) Mean fraction of travellers with each  
 244 screening outcome. The black dashed lines separate detected cases (below) from missed  
 245 cases (above).

246 *Interactive online app for public use*

247  
248 We have developed an interactive web application using Shiny in which users can replicate our  
249 analyses using parameter inputs that reflect the most up-to-date information. The  
250 supplementary user interface can be accessed at  
251 <https://faculty.eeb.ucla.edu/lloydsmith/screeningmodel>. Please note that while the results in Fig.  
252 3 consider a range of plausible values for each parameter, the outputs of the Shiny app are  
253 calculated using fixed, user-specified values only.

254  
255  
256

## 257 **Discussion**

258  
259 The international expansion of nCoV cases has led to travel screening measures being  
260 proposed and implemented in numerous countries. Given the rapid growth of the epidemic in  
261 China, emphasis on these measures is likely to rise in an attempt to prevent community spread  
262 of the virus in new geographic areas. Using a mathematical model of screening with preliminary  
263 estimates of nCoV epidemiology and natural history, we found that screening will in the best  
264 case only detect less than half of infected travellers. We found that two main factors influenced  
265 the effectiveness of screening. First, symptom screening depends on the natural history of an  
266 infection: individuals are increasingly likely to show detectable symptoms with increasing time  
267 since exposure. A fundamental challenge of screening is that many infected individuals will  
268 travel during their incubation period, a point at which they still feel healthy enough to travel but  
269 are simultaneously most difficult to detect. This effect is amplified when the incubation period is  
270 longer; infected individuals have a longer window in which they may travel with low probability of  
271 detection. Second, screening depends on whether exposure risk factors exist that would  
272 facilitate specific and reasonably sensitive case detection by questionnaire. For nCoV, there is  
273 so far limited evidence for specific risk factors; we therefore assumed that at most 40% of  
274 travellers would be aware of a potential exposure, and that a minority would self-report their  
275 exposure honestly, which led to limited effectiveness in questionnaire-based screening. The  
276 confluence of these two factors led to many infected travellers being fundamentally  
277 undetectable. Even under our most generous assumptions about the natural history of nCoV,  
278 the presence of undetectable travellers made the greatest contribution to screening failure.  
279 Correctable failures, such as missing a traveller with fever or awareness of their exposure risk,  
280 played a more minor role.

281  
282 There are some limitations to our analysis. Parameter values for nCoV, such as the incubation  
283 period, are based on the limited data currently available. For such parameters, the tail of the  
284 distribution is important for understanding the potential for long delays until symptoms, but the  
285 tails of skewed distributions are notoriously difficult to characterize using limited data. In  
286 general, current parameter estimates may also be affected by bias or censoring, particularly in  
287 the early stages of an outbreak when most cases have been recently infected, and when data  
288 are primarily available for relatively severe, hospitalized cases. Another crucial uncertainty  
289 highlighted by our analysis is the frequency of cases too mild or non-specific to be detected as

290 nCoV infections. At least one asymptomatic case is known to have occurred in a child (Chan et  
291 al., 2020). Further, children and young adults have been conspicuously underrepresented  
292 among hospitalized cases (Chen et al., 2020; Huang et al., 2020; Li et al., 2020). The possibility  
293 cannot be ruled out that large numbers of subclinical cases are occurring, especially in young  
294 people. If an age-by-severity interaction does indeed exist, then the mean age of travellers  
295 should be taken into account when estimating screening effectiveness. Further, transmission  
296 occurred before the onset of symptoms in one recent case report (Rothe et al., 2020). While it is  
297 too early to draw conclusions from a single case report, determining whether pre-symptomatic  
298 transmission is the norm also has major implications for the risk of establishing on-going spread  
299 in new locales .

300

301 As country-specific screening policies can change rapidly in real-time, we focused on a general  
302 screening framework rather than specific case studies. We also assumed traveller adherence  
303 and no active evasion of screening. However, there are informal reports of people taking  
304 antipyretics to beat fever screening (Mahbubani, 2020), which would further reduce the  
305 effectiveness of these methods. With travel restrictions in place, individuals may also take  
306 alternative routes (e.g. road rather than air), which would in effect circumvent departure and/or  
307 arrival screening as a control measure. Our quantitative findings may overestimate screening  
308 effectiveness if many travellers evade screening.

309

310 Our results have several implications for the design and implementation of control measures.  
311 Arrival screening could delay the introduction of cases if the infection is not yet present (Cowling  
312 et al., 2010), or reduce the initial rate of spread by limiting the number of parallel chains of  
313 transmission initially present in a country. But because screening is inherently leaky, it is crucial  
314 to also have measures in place to identify cases missed at arrival screening. For example,  
315 travellers could be provided with an information card to self-screen and self-report (Public  
316 Health England, n.d.), alongside increased general surveillance/alertness in healthcare settings.  
317 We should not take false confidence from reports that infected travellers are being detected by  
318 existing screening programs. Our findings indicate that for every case detected by travel  
319 screening, one or more infected travellers were not caught, and must be found and isolated by  
320 other means.

321

322 The expected high miss rate of screening programs also has implications for assessing when  
323 different programs are worthwhile investments. For areas yet to experience community-based  
324 transmission of the virus, and subject to substantial traveller inflows from affected areas, arrival  
325 screening can delay importation of cases and build awareness among incoming travellers.  
326 Even once there is some early-stage community transmission in a specific location, arrival  
327 screening may still reduce the chance of multiple independent transmission chains and ease the  
328 work of contact tracing teams, although the relative benefit of such screening for overall case  
329 prevention with decline as local transmission increases. Once there is generalized spread which  
330 has outpaced contact tracing, departure screening to prevent export of cases to new areas will  
331 be more valuable than arrival screening to identify additional incoming cases. However the  
332 cost-benefit tradeoff for any screening policy should be assessed in light of past experiences,  
333 where few or no infected travellers have been detected by such programs (Gostic et al., 2015).

334  
335 Several factors could potentially strengthen the screening measures described here. With  
336 improved efficiency of thermal scanners or other symptom detection technology, we would  
337 expect a smaller difference between the effectiveness of arrival-only screening and combined  
338 departure and arrival screening in our analysis. Alternatively, the benefits of redundant  
339 screening (noted above for programs with departure and arrival screens) could be gained in a  
340 single-site screening program by simply having two successive fever-screening stations that  
341 travellers pass through (or taking multiple measurements of each traveller at a single station).  
342 As risk factors become better known, questionnaires could be refined to identify more potential  
343 cases. Alternatively, less stringent definition of high exposure risk (e.g. contact with anyone with  
344 respiratory symptoms) would be more sensitive. These approaches would boost sensitivity of  
345 screening, but could also incur a large cost in terms of false positives detained, especially  
346 during influenza season.

347  
348 The availability of rapid PCR tests would also be beneficial for case identification at arrival, and  
349 would address concerns with false-positive detections. If such tests were fast, there may be  
350 potential to test suspected cases in real time based on questionnaire responses, travel origin, or  
351 borderline symptoms. However, such measures could prove highly expensive if implemented at  
352 scale. There is also scope for new tools to improve the ongoing tracking of travellers who pass  
353 through screening, such as smartphone-based self-reporting of temperature or symptoms in  
354 incoming cases. Recent travellers could even be asked to maintain a diary of close contacts for  
355 14 days following arrival, to expedite contact tracing in the event they become ill with nCoV.  
356 This would be cheaper and more scalable than intense follow-up, but is likely to be limited by  
357 user adherence.

358  
359 Our analysis underscores the reality that respiratory viruses are difficult to detect by travel  
360 screening programs, particularly if a substantial fraction of infected people show mild or  
361 indistinct symptoms, and if incubation periods are long. Quantitative estimates of screening  
362 effectiveness will improve as more is learned about this recently-emerged virus, and will vary  
363 with the precise design of screening programs. However, we present a robust qualitative finding:  
364 in any situation where there is widespread epidemic transmission in source populations from  
365 which travellers are drawn, travel screening programs can slow but not stop the importation of  
366 infected cases. By decomposing the factors leading to success or failure of screening efforts,  
367 our work supports decision-making about program design, and highlights key questions for  
368 further research. We hope that these insights may help to mitigate the global impacts of nCoV  
369 by guiding effective decision-making in both high- and low-resource countries, and may  
370 contribute to prospective improvements in travel screening policy for future emerging infections.

371

## 372 **Materials and Methods**

373

### 374 *Modeling strategy*

375

376 The model's structure is summarized above (Fig. 1), and detailed methods have been described  
377 previously (Gostic et al., 2015). Here, we summarize relevant extensions, assumptions and  
378 parameter inputs.

379

### 380 *Extensions*

381

382 Our previous model tracked all the ways in which infected travellers can be detected by  
383 screening (fever screen, or risk factor screen at arrival or departure). Here, we additionally keep  
384 track of the many ways in which infected travellers can be missed (i.e. missed given fever  
385 present, missed given exposure risk present, missed given both present, or missed given  
386 undetectable). Cases who have not yet passed the incubation period are considered  
387 undetectable by fever screening, even if they will eventually develop symptoms in the future. In  
388 other words, no traveller is considered "missed given fever present" until they have passed the  
389 incubation period and show detectable symptoms. Infected travellers who progress to  
390 symptoms during their journey are considered undetectable by departure screening, but  
391 detectable by arrival screening. Additionally, in the supplementary user interface, we  
392 implemented the possibility that some fraction of infected travellers deliberately evade  
393 screening.

394

### 395 *Fraction of subclinical cases*

396

397 Our best-case scenario, in which only 5% of cases are subclinical, is consistent with the fact  
398 that the vast majority of nCoV cases detected to date have shown fever or other detectable  
399 symptoms (Chan et al., 2020; Chen et al., 2020; Huang et al., 2020). But so far the data have  
400 primarily captured severe, hospitalized cases, so the true fraction of subclinical nCoV cases  
401 remains a crucial unknown. Particularly given the conspicuous under-representation of children  
402 and young adults among hospitalized patients (Huang et al., 2020; Li et al., 2020), our medium  
403 and worst-case scenarios (75% and 50% subclinical) remain plausible.

404

### 405 *Incubation period distribution*

406

407 Numerous recent studies have estimated that the incubation period lasts about 5.5 days on  
408 average (Backer et al., 2020; Chan et al., 2020; Li et al., 2020; Liu et al., 2020), with the tail of  
409 the distribution stretching to at least 12 days (Backer et al., 2020; Li et al., 2020). Consistent  
410 with these observations, a recent study by Backer, Klinkberg and Wallinga (2020) characterized  
411 the incubation period distribution for nCoV, concluding that a Weibull distribution provided the  
412 best fit to data, but that a gamma distribution performed almost as well. We proceed by adopting  
413 their best-fit gamma distribution (mean 5.7 days, s.d. 2.6, or alternatively, shape = 4.8, scale =  
414 1.2), as the gamma form is more computationally convenient within our model. In order to vary  
415 the mean incubation period in our uncertainty analyses while maintaining the shape of this two-

416 parameter distribution, we fix the scale parameter to 1.2, and set the shape parameter equal to  
417  $\frac{mean}{1.2}$  (Fig. 3 - supplementary figure 1).

418

#### 419 *Effectiveness of exposure risk questionnaires*

420

421 The probability that an infected traveller is detectable using questionnaire-based screening for  
422 exposure risk will be highest if specific risk factors are known. Other than close contact with a  
423 known nCoV case, or contact with the Hunan seafood wholesale market in the earlier phase of  
424 the outbreak in Wuhan, we are not aware that any specific risk factors have been identified.  
425 Given the relative anonymity of respiratory transmission, we assume that a minority of infected  
426 travellers would realize that they have been exposed before symptoms develop (20% in Fig. 2,  
427 range 5-40% in Fig. 3). Further, relying on a previous upper-bound estimate (Gostic et al., 2015)  
428 we assume that only 25% of travellers would self-report truthfully if aware of elevated exposure  
429 risk.

430

431 Table 1 summarizes the state of knowledge about additional key natural history parameters, as  
432 of January 28, 2020.



433 **Acknowledgements**

434 We thank the Cobey lab for helpful comments.

435

436 **Funding**

437 KG was supported by a postdoctoral fellowship in the program for understanding dynamic &  
438 multiscale systems from the James S. McDonnell foundation. AJK was supported by a Sir Henry  
439 Dale Fellowship jointly funded by the Wellcome Trust and the Royal Society (grant Number  
440 206250/Z/17/Z). ACRG was supported by a CAPES Science Without Borders fellowship.  
441 ACRG, ROM and JOL-S were supported by NSF grant DEB-1557022, SERDP RC-2635, and  
442 DARPA PREEMPT D18AC00031. The content of the manuscript does not necessarily reflect  
443 the position or the policy of the U.S. government, and no official endorsement should be  
444 inferred.

445

446 **Competing interests**

447 The authors declare no competing interests.

448

449 **Code and data availability**

450 All code used in these analyses can be found at [https://github.com/kgostic/traveller\\_screening](https://github.com/kgostic/traveller_screening).

451 **References**

- 452
- 453 Backer JA, Klinkenberg D, Wallinga J. 2020. The incubation period of 2019-nCoV infections  
454 among travellers from Wuhan, China. *medRxiv* 2020.01.27.20018986.  
455 doi:10.1101/2020.01.27.20018986
- 456 Bitar D, Goubar A, Desenclos JC. 2009. International travels and fever screening during  
457 epidemics: A literature review on the effectiveness and potential use of non-contact  
458 infrared thermometers. *Eurosurveillance* **14**:1–5.
- 459 Chan JF, Yuan S, Kok K, To KK, Chu H, Yang J, Xing F, Liu J, Yip CC, Poon RW, Tsoi H, Lo  
460 SK, Chan K, Poon VK, Chan W, Ip JD, Cai J-P, Cheng VC-C, Chen H, Hui CK-M, Yuen  
461 K-Y. 2020. Articles A familial cluster of pneumonia associated with the 2019 novel  
462 coronavirus indicating person-to-person transmission : a study of a family cluster. *The*  
463 *Lancet* 1–10. doi:10.1016/S0140-6736(20)30154-9
- 464 Chen N, Zhou M, Dong X, Qu J, Gong F, Han Y, Qiu Y, Wang J, Liu Y, Wei Y, Xia J, Yu T,  
465 Zhang X, Zhang L. 2020. Epidemiological and clinical characteristics of 99 cases of 2019  
466 novel coronavirus pneumonia in Wuhan, China: a descriptive study. *The Lancet* **0**.  
467 doi:10.1016/S0140-6736(20)30211-7
- 468 Cowling BJ, Lau LL, Wu P, Wong HW, Fang VJ, Riley S, Nishiura H. 2010. Entry screening to  
469 delay local transmission of 2009 pandemic influenza A (H1N1). *BMC Infect Dis* **10**:82.  
470 doi:10.1186/1471-2334-10-82
- 471 Gostic KM, Kucharski AJ, Lloyd-Smith JO. 2015. Effectiveness of traveller screening for  
472 emerging pathogens is shaped by epidemiology and natural history of infection. *eLife*  
473 **2015**:1–16. doi:10.7554/eLife.05564
- 474 Huang C, Wang Y, Li X, Ren L, Zhao J, Hu Y, Zhang L, Fan G, Xu J, Gu X, Cheng Z, Yu T, Xia  
475 J, Wei Y, Wu W, Xie X, Yin W, Li H, Liu M, Xiao Y, Gao H, Guo L, Xie J, Wang G, Jiang  
476 R, Gao Z, Jin Q, Wang J, Cao B. 2020. Articles Clinical features of patients infected with  
477 2019 novel coronavirus in Wuhan, China. *The Lancet* 1–10. doi:10.1016/S0140-  
478 6736(20)30183-5
- 479 Imai N, Cori A, Dorigatti I, Baguelin M, Donnelly CA, Riley S, Neil M. 2019. Report 3:  
480 Transmissibility of 2019-nCoV. London.
- 481 Kucharski AJ, Russell T, Diamond C, Funk S, Eggo R. n.d. Analysis of early transmission of  
482 2019-nCoV and implications for outbreaks in new locations.
- 483 Li Q, Guan X, Wu P, Wang X, Zhou L, Tong Y, Ren R, Leung KSM, Lau EHY, Wong JY, Xing X,  
484 Xiang N, Wu Y, Li C, Chen Q, Li D, Liu T, Zhao J, Liu M, Tu W, Chen C, Jin L, Yang R,  
485 Wang Q, Zhou S, Wang R, Liu H, Luo Y, Liu Y, Shao G, Li H, Tao Z, Yang Y, Deng Z,  
486 Liu B, Ma Z, Zhang Y, Shi G, Lam TTY, Wu JT, Gao GF, Cowling BJ, Yang B, Leung  
487 GM, Feng Z. 2020. Early Transmission Dynamics in Wuhan, China, of Novel  
488 Coronavirus–Infected Pneumonia. *N Engl J Med* **0**:null. doi:10.1056/NEJMoa2001316
- 489 Liu T, Hu J, Kang M, Lin L, Zhong H, Xiao J, He G, Song T, Huang Q, Rong Z, Deng A, Zeng  
490 W, Tan X, Zeng S, Zhu Z, Li J, Wan D, Lu J, Deng H, He J, Ma W. 2020. Transmission  
491 dynamics of 2019 novel coronavirus (2019-nCoV). *bioRxiv* 1–13.
- 492 Priest PC, Duncan AR, Jennings LC, Baker MG. 2011. Thermal Image Scanning for Influenza  
493 Border Screening: Results of an Airport Screening Study. *PLOS ONE* **6**:e14490.  
494 doi:10.1371/journal.pone.0014490
- 495 Read JM, Bridgen JRE, Cummings DAT, Ho A, Jewell CP. 2020. Novel coronavirus 2019-nCoV:  
496 early estimation of epidemiological parameters and epidemic predictions. *medRxiv*.  
497 doi:10.1101/2020.01.23.20018549
- 498 Riou J, Althaus CL. 2020. Pattern of early human-to-human transmission of Wuhan 2019-nCoV.  
499 *bioRxiv* 1–6.
- 500 Tay MR, Low YL, Zhao X, Cook AR, Lee VJ. 2015. Comparison of Infrared Thermal Detection

- 501 Systems for mass fever screening in a tropical healthcare setting. *Public Health*  
502 **129**:1471–1478. doi:10.1016/j.puhe.2015.07.023
- 503 World Health Organization. n.d. Novel coronavirus (2019-nCov) Situation Report 12.  
504 [https://www.who.int/docs/default-source/coronaviruse/situation-reports/20200201-sitrep-](https://www.who.int/docs/default-source/coronaviruse/situation-reports/20200201-sitrep-12-ncov.pdf?sfvrsn=273c5d35_2)  
505 [12-ncov.pdf?sfvrsn=273c5d35\\_2](https://www.who.int/docs/default-source/coronaviruse/situation-reports/20200201-sitrep-12-ncov.pdf?sfvrsn=273c5d35_2)
- 506 Wu JT, Leung K, Leung GM. 2020. Nowcasting and forecasting the potential domestic and  
507 international spread of the 2019-nCoV outbreak originating in Wuhan, China: a  
508 modelling study. *The Lancet* **0**. doi:10.1016/S0140-6736(20)30260-9

509 **Supplementary Figures**  
 510

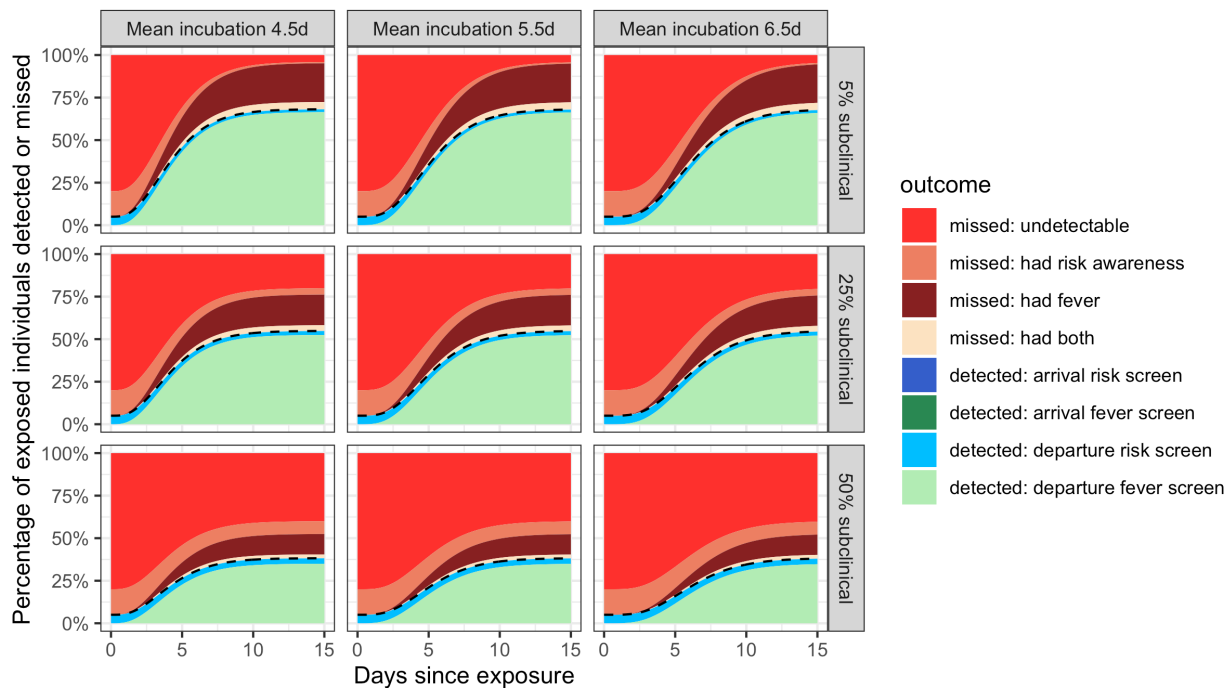

511  
 512 Fig 2-Supplementary figure 1. Departure screening only.

513  
 514  
 515  
 516

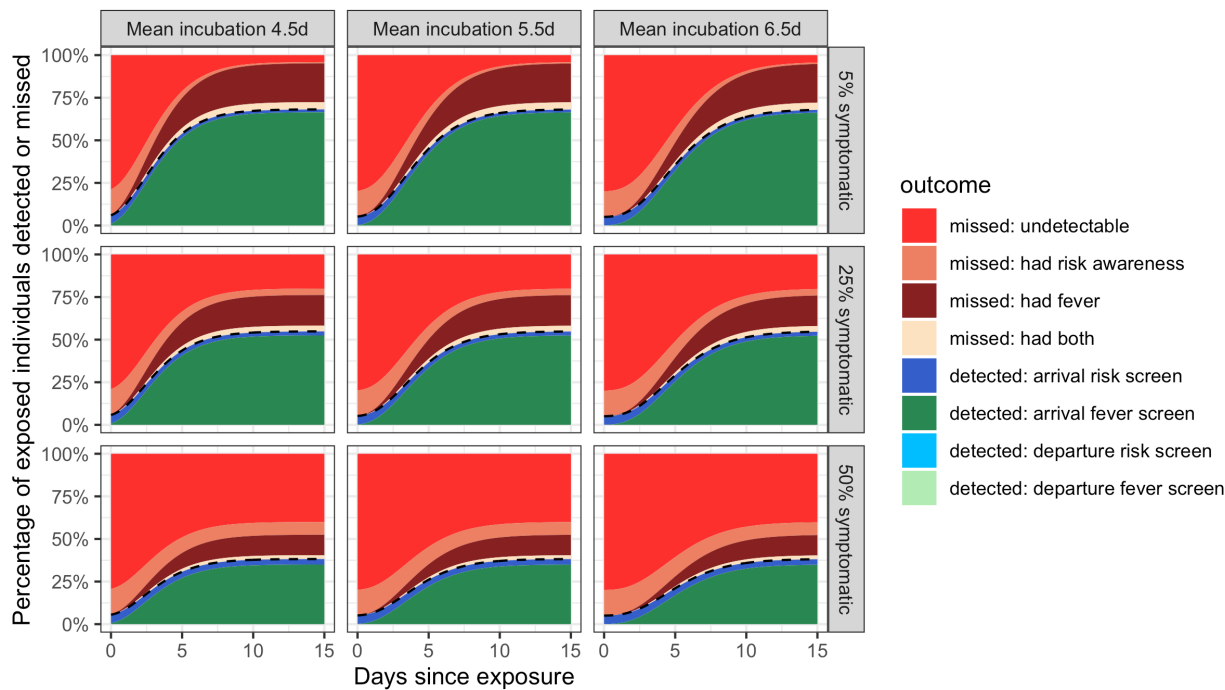

517  
 518 Fig 2-Supplementary figure 2. Arrival screening only.

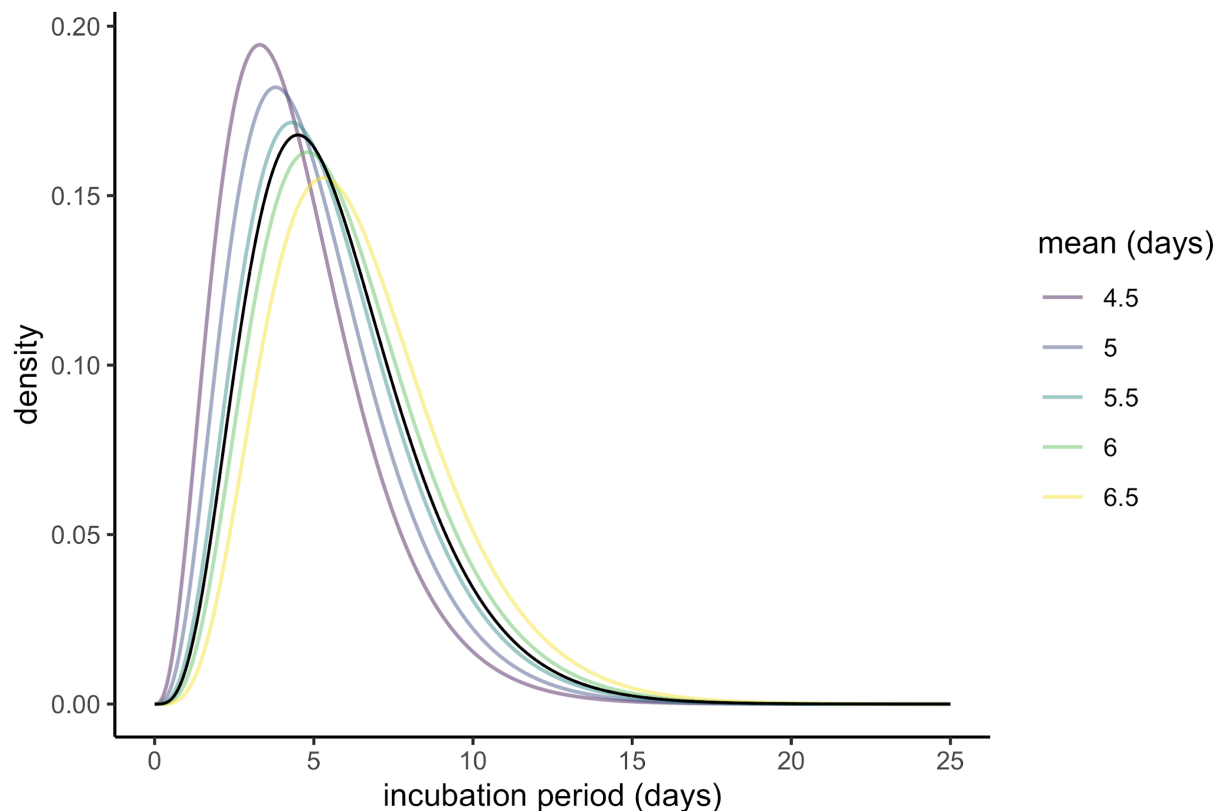

519  
520 **Fig 3 - Supplementary figure 1. Plausible incubation period distributions underlying the**  
521 **analyses in Fig. 3.** The black line shows the probability density function of the best-fit gamma  
522 distribution reported by (Backer et al., 2020). Other lines show the probability density functions  
523 for different assumptions regarding the mean incubation period. Each is a gamma distribution  
524 with scale = 1.2, and shape =  $\frac{mean}{1.2}$ .
